# Supplementary material for: Who has nature during the pandemic? COVID-19 cases track widespread inequity in nature access across the United States
Source: Research Square preprint supplement (doi:10.21203/rs.3.rs-203637/v1), 2021-02-09
Supplement: Supplementary file 1 [file 658ad721e2be4b779de61a5a.pdf]

## Supplementary Materials

a)

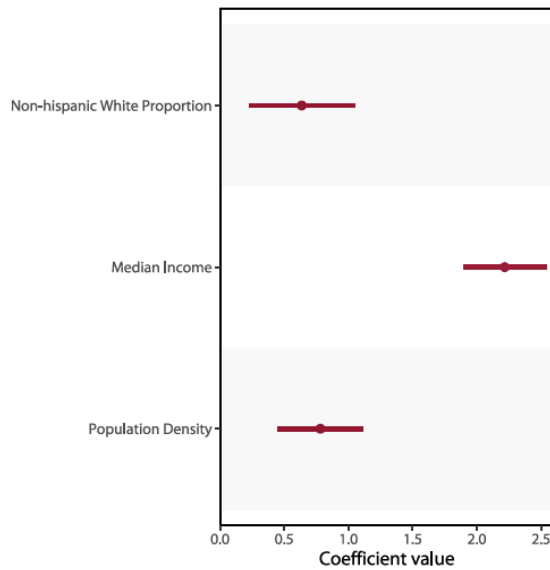

b)

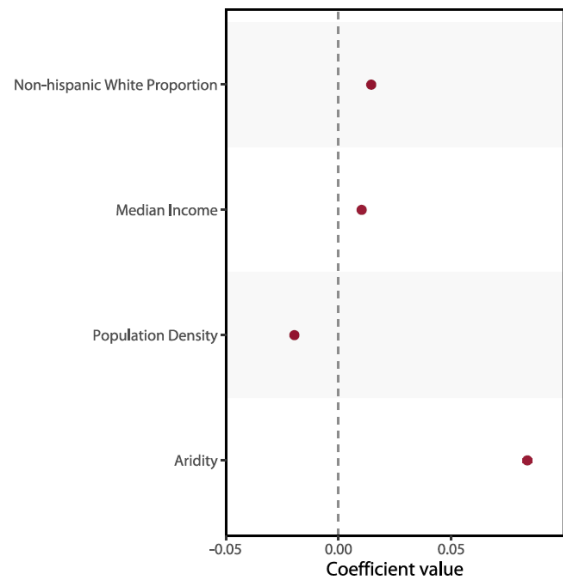

**Extended Data Fig. 1** | Modeled coefficient values from SAR models of nature inequity, including models of **a**, park proximity (ha), and **b**, greenness (NDVI) with including variables for the percent white residents, median income, population density, and aridity (NDVI model only) in 142,325 block groups each block group across 486 urbanized areas. Coefficient values are represented as dots, bars represent 95% confidence intervals, and significant variables are shown in red.

**Extended Data Table 1.** State-level summary statistics in 17 states with ZIP Code scale COVID-19 case data, including the number of ZIP Codes, mean days since the first case was recorded (county-scale), mean COVID-19 cases per 100,000 people, mean NDVI and park proximity (ha), average proportion white residents, age, and median income in ZIP Codes in each state.

| State          | ZIP Codes | Days since first case | Covid-19 Cases per 100,000 | NDVI | Park access (ha) | Percent white | Median age | Median income |
|----------------|-----------|-----------------------|----------------------------|------|------------------|---------------|------------|---------------|
| Arizona        | 126       | 259                   | 3,188                      | 0.27 | 23.91            | 56%           | 38.9       | \$ 60,574     |
| Arkansas       | 43        | 217                   | 2,389                      | 0.66 | 21.65            | 69%           | 38.4       | \$ 51,784     |
| Delaware       | 22        | 223                   | 1,988                      | 0.65 | 73.14            | 62%           | 41.1       | \$ 67,816     |
| Florida        | 526       | 225                   | 3,319                      | 0.53 | 30.61            | 56%           | 43.3       | \$ 57,145     |
| Hawaii         | 20        | 229                   | 895                        | 0.56 | 111.31           | 20%           | 40.7       | \$ 84,762     |
| Illinois       | 421       | 238                   | 2,221                      | 0.59 | 63.98            | 64%           | 39.0       | \$ 70,706     |
| Indiana        | 170       | 220                   | 1,678                      | 0.64 | 33.29            | 73%           | 37.8       | \$ 54,526     |
| Maine          | 18        | 220                   | 743                        | 0.69 | 36.08            | 90%           | 42.7       | \$ 60,477     |
| Maryland       | 170       | 225                   | 2,040                      | 0.65 | 82.96            | 52%           | 39.2       | \$ 90,443     |
| New Jersey     | 143       | 226                   | 2,345                      | 0.55 | 59.27            | 48%           | 39.2       | \$ 79,718     |
| New Mexico     | 28        | 219                   | 1,224                      | 0.30 | 81.63            | 44%           | 38.2       | \$ 49,746     |
| North Carolina | 178       | 220                   | 1,979                      | 0.67 | 36.18            | 64%           | 38.7       | \$ 59,195     |
| Oklahoma       | 83        | 223                   | 2,692                      | 0.54 | 26.63            | 57%           | 35.2       | \$ 51,535     |
| Oregon         | 64        | 227                   | 820                        | 0.54 | 87.42            | 73%           | 38.4       | \$ 67,233     |
| Pennsylvania   | 508       | 221                   | 1,207                      | 0.63 | 35.11            | 78%           | 41.3       | \$ 65,125     |
| Rhode Island   | 41        | 211                   | 2,049                      | 0.60 | 55.58            | 75%           | 40.3       | \$ 66,785     |
| South Carolina | 91        | 220                   | 2,963                      | 0.63 | 21.81            | 66%           | 38.9       | \$ 54,058     |

**Extended Data Table 2** | Greenness (NDVI) and park proximity (ha) (mean and SD) in block groups with majority POC and majority white residents across four income quantiles. Data from nature inequality analysis of all 486 urbanized areas in the US including 142,325 block groups. Sample sizes (n) show the number of block groups in each category of income and race/ethnicity.

| Data category                | n      | NDVI<br>(mean) | NDVI<br>(SD) | Park proximity<br>(mean ha) | Park proximity<br>(SD ha) |
|------------------------------|--------|----------------|--------------|-----------------------------|---------------------------|
| <b><i>Income</i></b>         |        |                |              |                             |                           |
| Income quantile 1            | 35,646 | 0.43           | 0.15         | 17.50                       | 21.20                     |
| Income quantile 2            | 35,394 | 0.47           | 0.15         | 17.40                       | 21.60                     |
| Income quantile 3            | 35,521 | 0.51           | 0.15         | 18.90                       | 23.70                     |
| Income quantile 4            | 35,764 | 0.52           | 0.16         | 21.10                       | 25.70                     |
| <b><i>Race/ethnicity</i></b> |        |                |              |                             |                           |
| Majority POC                 | 59,050 | 0.422          | 0.148        | 17.90                       | 22.30                     |
| Majority white               | 83,275 | 0.529          | 0.142        | 19.40                       | 23.70                     |

**Extended Data Table 3** | Park databases compiled to create the most comprehensive database possible using publicly available information. Parks were reconciled across databases by identifying which parks were unique to each database, and which were represented in more than one database.

| Database name                              | Total # parks | # unique to dataset | Website                                                                                                                                                                                                                   |
|--------------------------------------------|---------------|---------------------|---------------------------------------------------------------------------------------------------------------------------------------------------------------------------------------------------------------------------|
| US Protected Areas Database                | 286,591       | 155,830             | <a href="https://www.usgs.gov/core-science-systems/science-analytics-and-synthesis/gap/science/protected-areas">https://www.usgs.gov/core-science-systems/science-analytics-and-synthesis/gap/science/protected-areas</a> |
| National Conservation Easement Database    | 5,779         | 364                 | <a href="https://www.conservationeasement.us/">https://www.conservationeasement.us/</a>                                                                                                                                   |
| ESRI USA Parks                             | 55,835        | 7,889               | <a href="https://www.arcgis.com/home/item.html?id=578968f975774d3fab79fe56c8c90941">https://www.arcgis.com/home/item.html?id=578968f975774d3fab79fe56c8c90941</a>                                                         |
| TPL ParkServe®                             | 197,065       | 73,302              | <a href="https://www.tpl.org/parkserve/downloads">https://www.tpl.org/parkserve/downloads</a>                                                                                                                             |
| Parks represented in multiple data sources |               | 100,056             |                                                                                                                                                                                                                           |
